# Supplementary material
Source: HighWire-hosted journal article supplement (http://molpharm.aspetjournals.org/highwire/filestream/76873/field_highwire_adjunct_files/0/Bhave_SuppFig._1.pdf)
Supplement: Bhave_SuppFig._1.pdf [file Bhave_SuppFig._1.pdf]

**Development of a selective small-molecule inhibitor of Kir1.1, the Renal Outer Medullary Potassium Channel.** Gautam Bhave, Brian A. Chauder, Wen Liu, Eric S. Dawson, Rishin Kadakia, Thuy, T. Nguyen, L. Michelle Lewis, Jens Meiler, C. David Weaver, Lisa M. Satlin, Craig W. Lindsley, and Jerod S. Denton. *Molecular Pharmacology*.

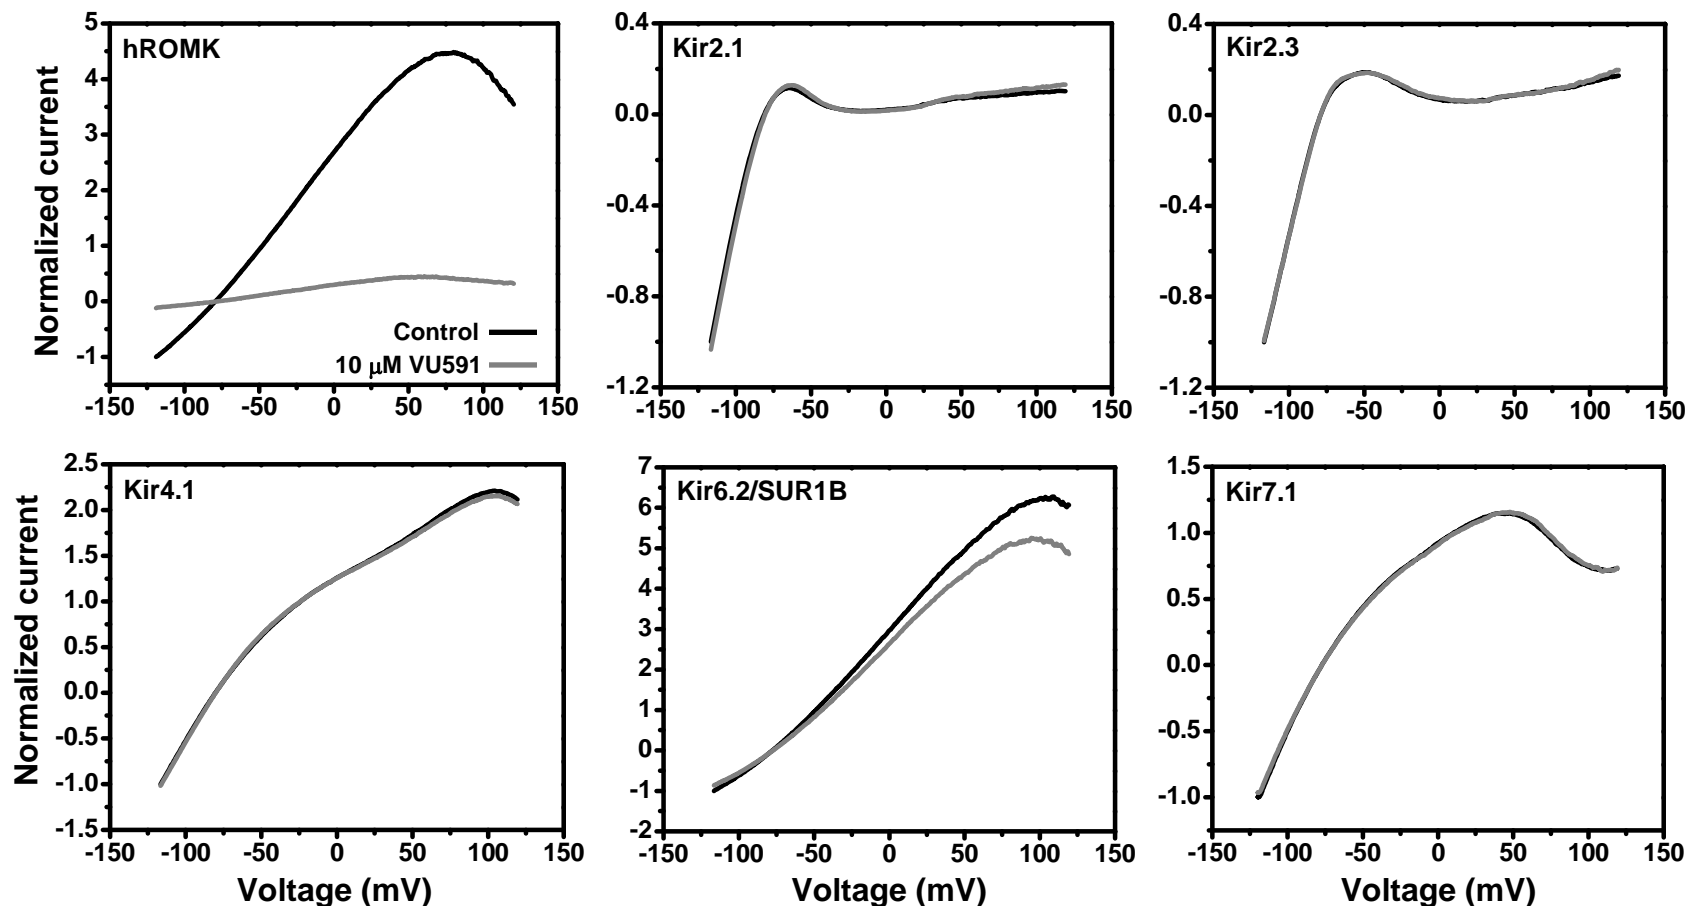

**Supplemental Figure 1.** Current traces evoked from HEK-293 cells expressing the Kir channel indicated. Cells were voltage ramped between -120 mV and 120 mV at a rate of 2.4 mV/msec every 5 sec from a holding potential of -75 mV. Representative current traces recorded in the absence (control) or presence of 10 μM VU591 are shown.
